# Supplementary material for: Characterization of Two Aggressive PepMV Isolates Useful in Breeding Programs
Source: MDPI journal article supplement (doi:10.3390/v15112230), 2023-11-08
Supplement: s1 [file s1]

A

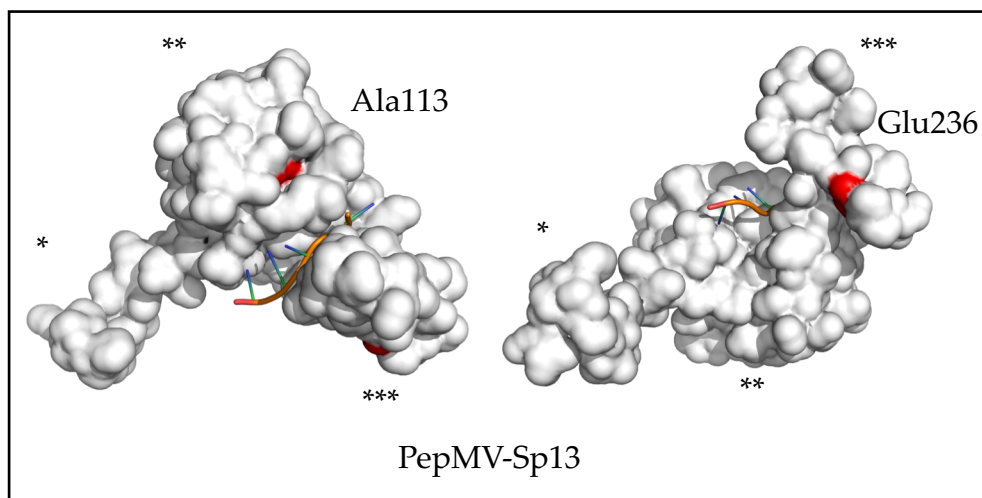

B

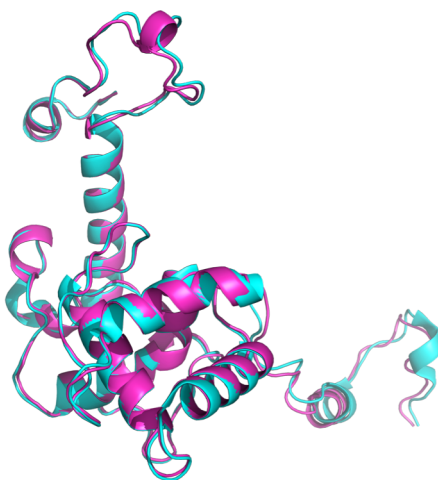

PepMV-Sp13 (cyan) and PepMV-H30 (magenta) CPs alignment  
 RMSD = 0.797

**Figure S1. Position of residues Ala113 and Glu236 in the PepMV-Sp13 CP and alignment of the atomic models of the PepMV-Sp13 and PepMV-H30 CPs. (A)** Atomic model of the PepMV-Sp13 CP represented in solvent accessibility mode. The viral RNA is shown in orange and residues Ala113 and Glu236 for the PepMV-Sp13 CP are colored in red. One, two or three asterisks indicates the N-terminal arm, the core region or the C-terminal extension of the CP. **(B)** Alignment of the PepMV-Sp13 (cyan) and PepMV-H30 (magenta) CPs. The root-mean-square deviation (RMSD) of the alignment is indicated in the figure.

**Table S1: List of primers used for the sequencing of PepMV-H30 and PepMV-KLP2 isolates.**

| Primer  | Sequence                                       | Target isolate           |
|---------|------------------------------------------------|--------------------------|
| CE-126  | 5'-GACTTTCATCTCTGACAGA-3'                      | PepMV-H30                |
| CE-200  | 5'-GCCACCTCGGTTACATTGAAGC-3'                   | PepMV-H30 and PepMV-KLP2 |
| CE-250  | 5'-CATGACTTCAAATTGAAGC-3'                      | PepMV-H30 and PepMV-KLP2 |
| CE-290  | 5'-GTGGTGTCCAACAATTCGAG-3'                     | PepMV-H30 and PepMV-KLP2 |
| CE-301  | 5'-GAAAGAACTTCATATATACGC-3'                    | PepMV-H30                |
| CE-306  | 5'-CGACCGACGCGTAACTTCTCCCCTTGGAACG-3'          | PepMV-H30                |
| CE-411  | 5'-CCTTCAGAACTCATAGATTG-3'                     | PepMV-H30 and PepMV-KLP2 |
| CE-412  | 5'-GGAGCTGTATTGGGATTGAGAAGTC-3'                | PepMV-H30                |
| CE-432  | 5'-CCCAGCATTGCCACACAAG-3'                      | PepMV-H30                |
| CE-434  | 5'-CTGGAATGCTTGGATCCCATT-3'                    | PepMV-KLP2               |
| CE-435  | 5'-GCCATCTGGGCCGTATTG-3'                       | PepMV-KLP2               |
| CE-501  | 5'-GAAAACCTTCACCCGTTCCAAGTTATTTGTATAGTTCATC-3' | PepMV-H30                |
| CE-503  | 5'-GAAAACCTTAACCCGTTCCAAGTTAAAGTTCAGGGGGTG-3'  | PepMV-H30                |
| CE-504  | 5'-CACCCCCTGAACCTTAACCTGGAACGGGTTAAGTTTTC-3'   | PepMV-H30                |
| CE-505  | 5'-GTGCTTGCAACCATGTCCTTT-3'                    | PepMV-H30                |
| CE-508  | 5'-CCTTGCATTATCGATTGATGCA-3'                   | PepMV-H30                |
| CE-1818 | 5'-GCAATCCAAACACATACTCATGC-3'                  | PepMV-H30 and PepMV-KLP2 |
| CE-1819 | 5'-TGTGTAAGTTTCATCAGGGTCATAC-3'                | PepMV-KLP2               |
| CE-1820 | 5'-AGTCATGTTGTATGGTACTATGGC-3'                 | PepMV-KLP2               |
| CE-1906 | 5'-CCAGATGAAGCTGAACAAC-3'                      | PepMV-H30 and PepMV-KLP2 |
| CE-1966 | 5'-ATGCCATGTCGACCC(T)30-3'                     | PepMV-H30 and PepMV-KLP2 |
| CE-2158 | 5'-TCCTTCGGATGCCAGGTCG-3'                      | PepMV-H30                |
| CE-2159 | 5'-GACCTTCCTCTATATAAGG-3'                      | PepMV-H30 and PepMV-KLP2 |
| CE-2173 | 5'-TCAATAAGGTGACACAAAGAGATATC-3'               | PepMV-KLP2               |
